# Supplementary material for: The influences of El Niño–Southern Oscillation on tropospheric ozone in CMIP6 models
Source: Copernicus journal article supplement (doi:10.5194/acp-24-6555-2024), 2024-06-04
Supplement: Supplementary file 1 [file acp-24-6555-2024-supplement.pdf]

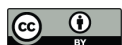

*Supplement of*

## **The influences of El Niño–Southern Oscillation on tropospheric ozone in CMIP6 models**

**Thanh Le et al.**

*Correspondence to:* Thanh Le ([levinhthanh.lvt@gmail.com](mailto:levinhthanh.lvt@gmail.com)) and Deg-Hyo Bae ([dhbae@sejong.ac.kr](mailto:dhbae@sejong.ac.kr))

The copyright of individual parts of the supplement might differ from the article licence.

MODELS STD OF ANNUAL OZ300 (ppbv) PERIOD 1850-2014 EXPERIMENT HISTORICAL

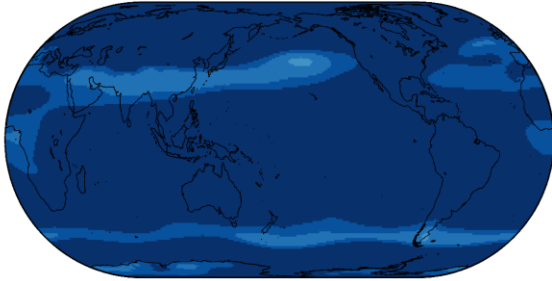

MODELS STD OF ANNUAL OZ500 (ppbv) PERIOD 1850-2014 EXPERIMENT HISTORICAL

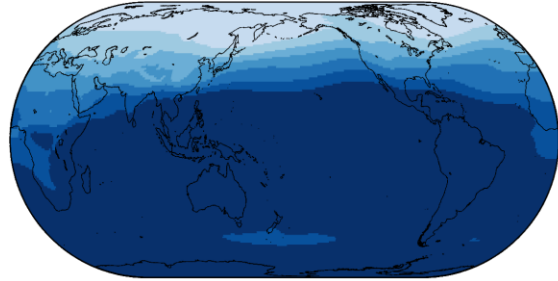

MODELS STD OF ANNUAL OZ850 (ppbv) PERIOD 1850-2014 EXPERIMENT HISTORICAL

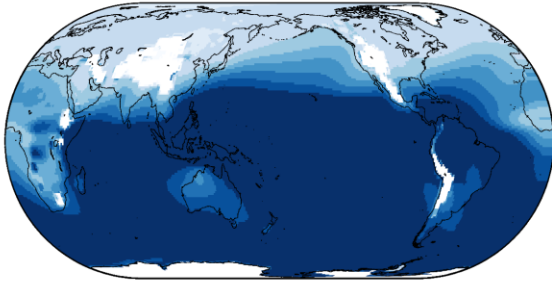

MODELS STD OF ANNUAL OZ1000 (ppbv) PERIOD 1850-2014 EXPERIMENT HISTORICAL

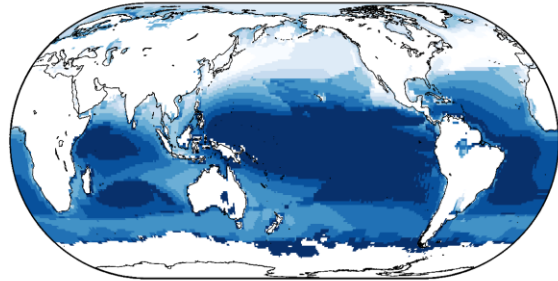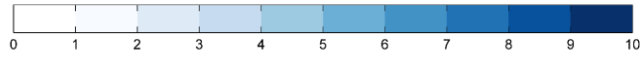

1

2 **Figure S1.** Multi-model mean map of standard deviation of annual ozone concentrations (ppbv) for the  
3 historical experiment over the 1850-2014 period at 300 hPa (a), 500 hPa (b), 850 hPa (c) and 1000 hPa  
4 (d) pressure levels, respectively.

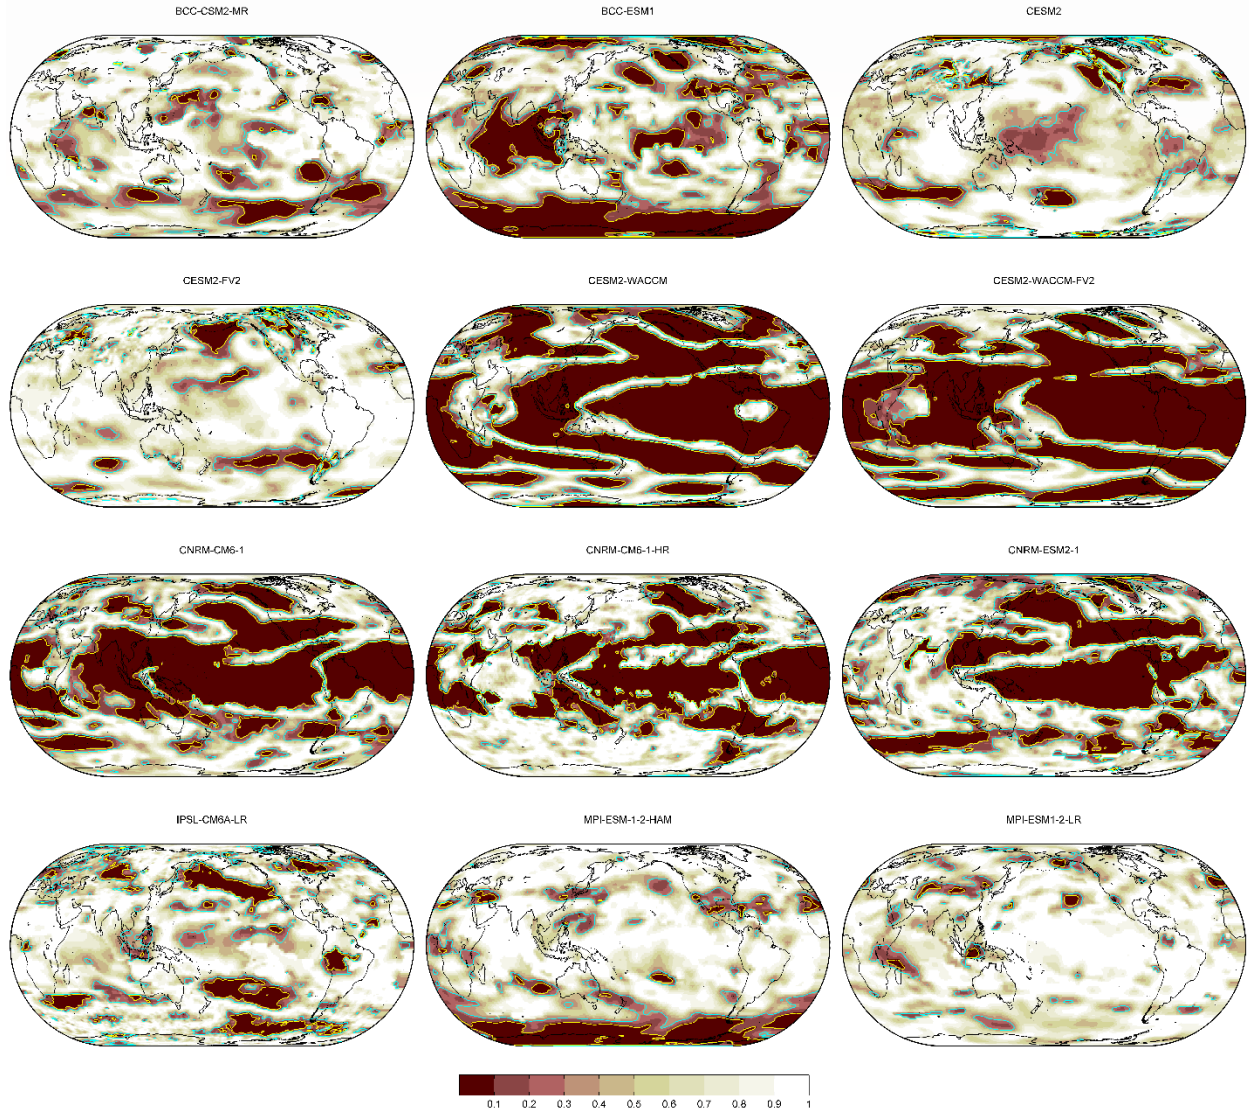

5  
6 **Figure S2.** Probability for the absence of Granger causality from ENSO to annual ozone concentrations at  
7 300 hPa pressure level for the historical experiment over the 1850-2014 period of 12 individual models  
8 (see Table S1). The cyan and yellow contour lines signify  $p$ -value = 0.33 and 0.1, respectively. Brown  
9 shades denote a low probability for the absence of Granger causality. ENSO: El Niño–Southern  
10 Oscillation.

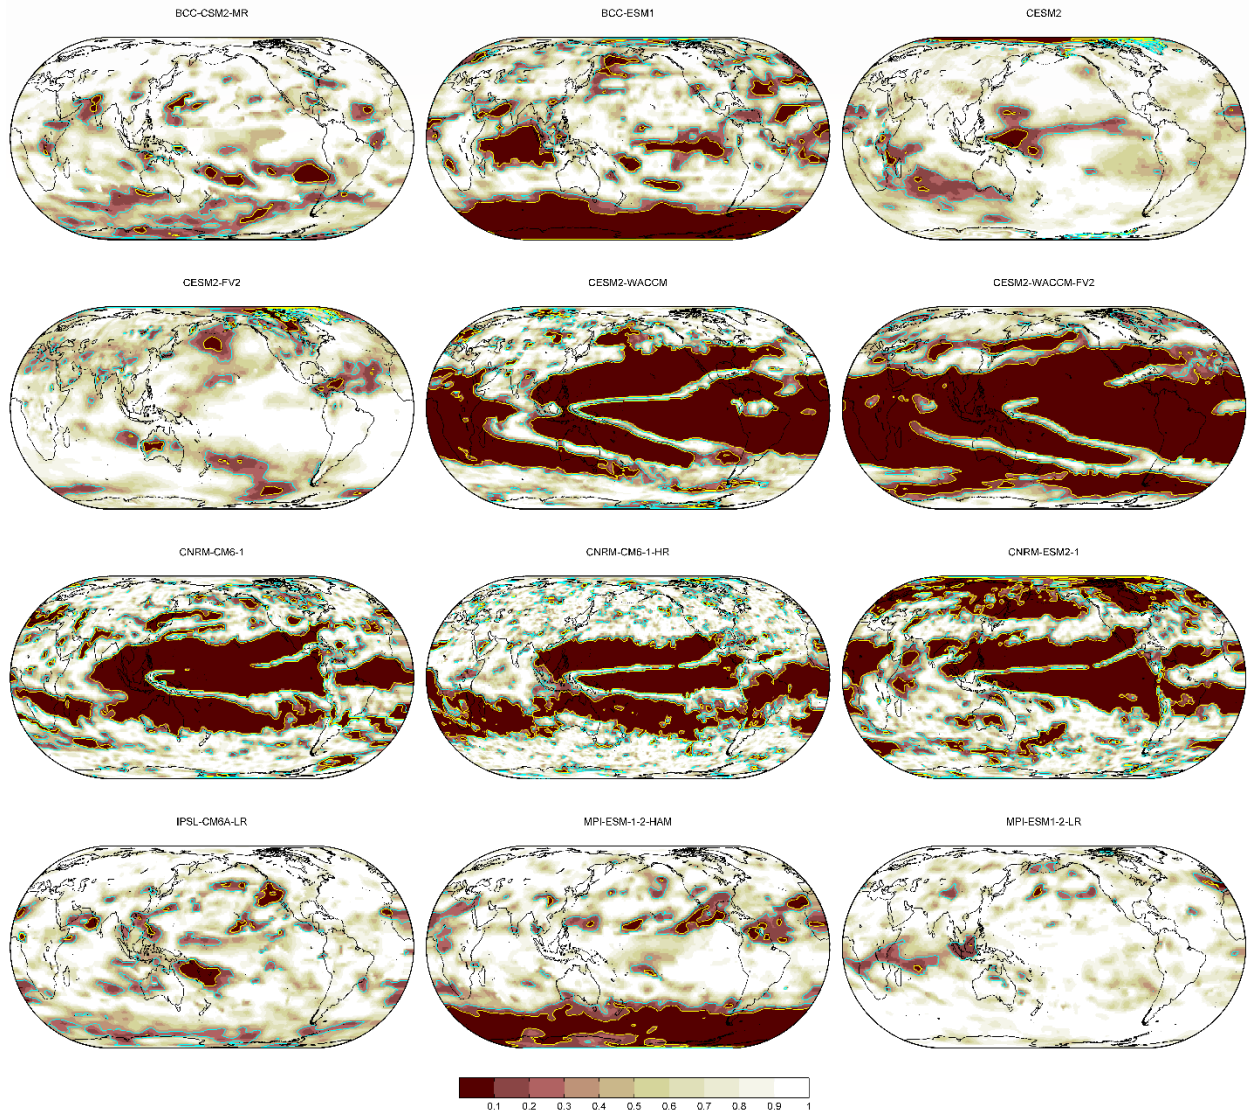

11

12 **Figure S3.** As in Figure S2, but for the absence of Granger causality from ENSO to annual ozone  
 13 concentrations at 500 hPa pressure level. ENSO: El Niño–Southern Oscillation.

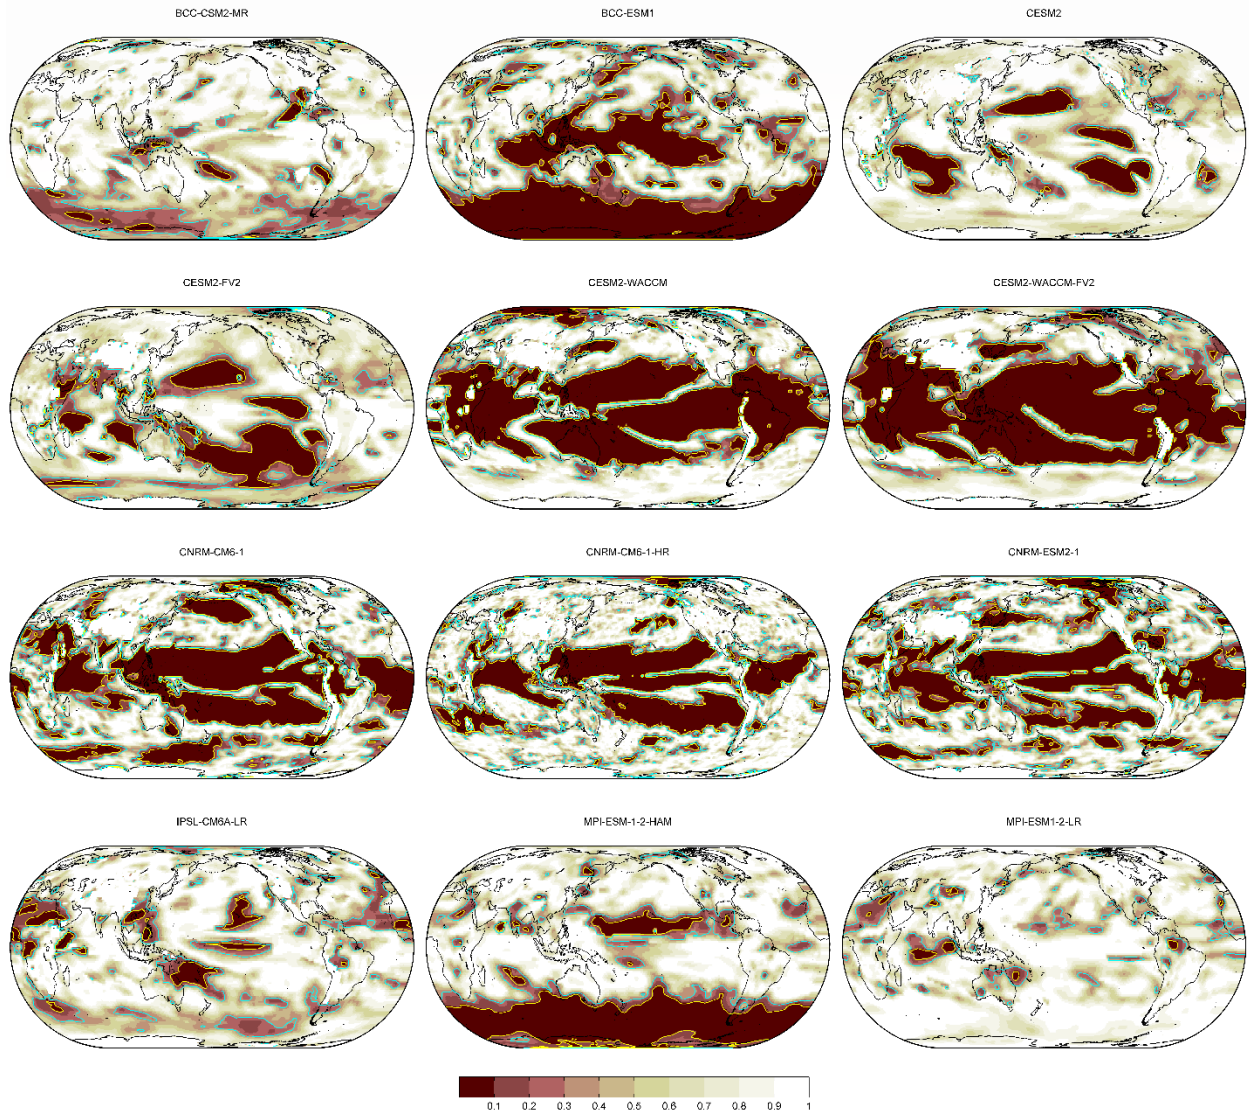

14

15 **Figure S4.** As in Figure S2, but for the absence of Granger causality from ENSO to annual ozone  
 16 concentrations at 850 hPa pressure level. ENSO: El Niño–Southern Oscillation.

MODELS MEAN: ENSO - SPRING OZONE (300 hPa) PERIOD 1850-2014 EXPERIMENT HISTORICAL      MODELS MEAN: ENSO - SUMMER OZONE (300 hPa) PERIOD 1850-2014 EXPERIMENT HISTORICAL

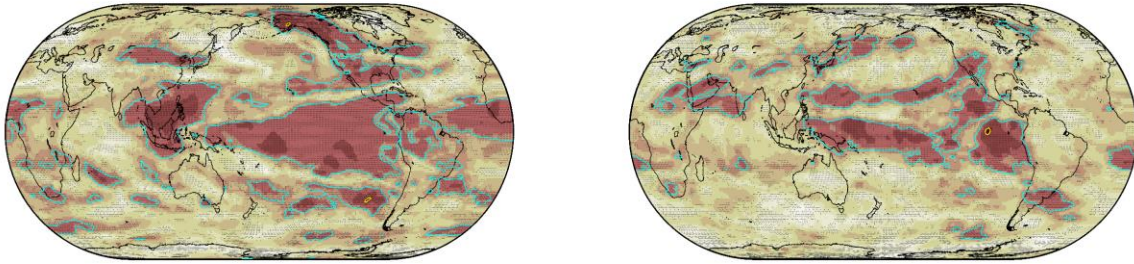

MODELS MEAN: ENSO - FALL OZONE (300 hPa) PERIOD 1850-2014 EXPERIMENT HISTORICAL      MODELS MEAN: ENSO - WINTER OZONE (300 hPa) PERIOD 1850-2014 EXPERIMENT HISTORICAL

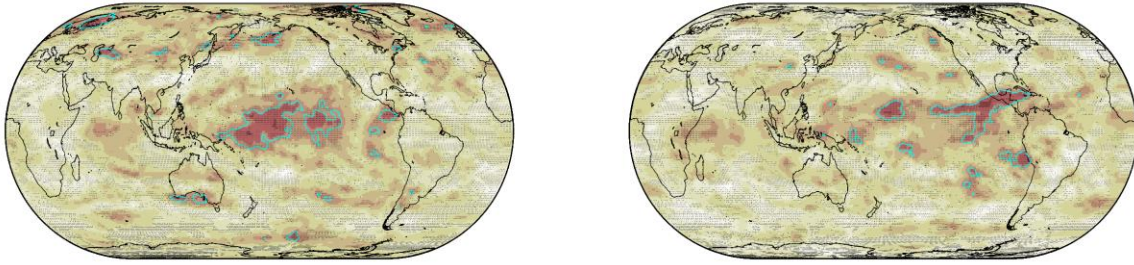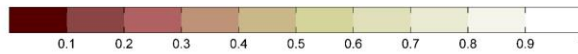

17

18 **Figure S5.** Multi-model mean probability map for the absence of Granger causality from ENSO during  
19 boreal winter [defined as  $D(t)JF(t+1)$ ;  $t$  denotes year  $t$ ] to seasonal mean ozone concentrations at 300 hPa  
20 pressure level over the period 1850-2014. (a) Spring [March, April, May;  $MAM(t+1)$ ]. (b) Summer [June,  
21 July, August;  $JJA(t+1)$ ]. (c) Fall [September, October, November;  $SON(t+1)$ ]. (d) Winter [December,  
22 January, February;  $D(t+1)JF(t+2)$ ]. Stippling demonstrates that at least 70% of total models show  
23 agreement on the mean probability of all models at a given grid point. The yellow and cyan contour lines  
24 denote p-value = 0.1 and 0.33, respectively. Brown shades denote a low probability for the absence of  
25 Granger causality. ENSO: El Niño–Southern Oscillation.

MODELS MEAN: ENSO - SPRING OZONE (500 hPa) PERIOD 1850-2014 EXPERIMENT HISTORICAL

MODELS MEAN: ENSO - SUMMER OZONE (500 hPa) PERIOD 1850-2014 EXPERIMENT HISTORICAL

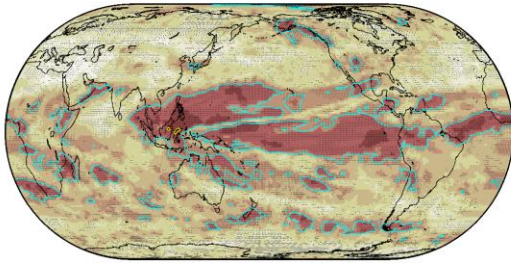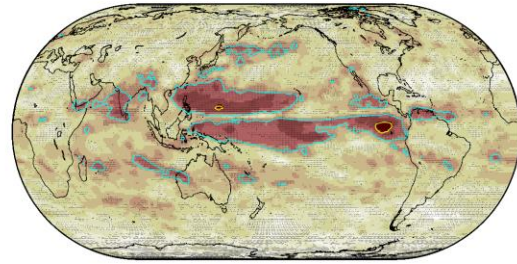

MODELS MEAN: ENSO - FALL OZONE (500 hPa) PERIOD 1850-2014 EXPERIMENT HISTORICAL

MODELS MEAN: ENSO - WINTER OZONE (500 hPa) PERIOD 1850-2014 EXPERIMENT HISTORICAL

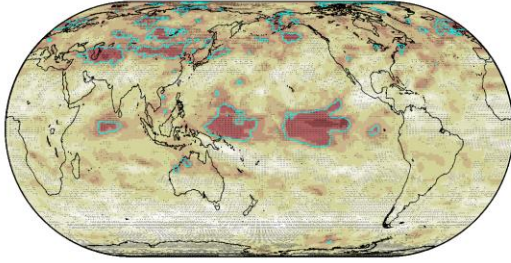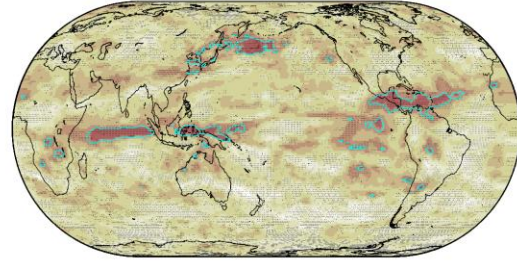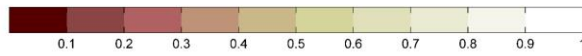

26

27 **Figure S6.** As in Figure S5, but for multi-model mean probability map for the absence of Granger  
28 causality from ENSO to seasonal mean ozone concentrations at 500 hPa pressure level. ENSO: El Niño–  
29 Southern Oscillation.

MODELS MEAN: ENSO - SPRING OZONE (850 hPa) PERIOD 1850-2014 EXPERIMENT HISTORICAL

MODELS MEAN: ENSO - SUMMER OZONE (850 hPa) PERIOD 1850-2014 EXPERIMENT HISTORICAL

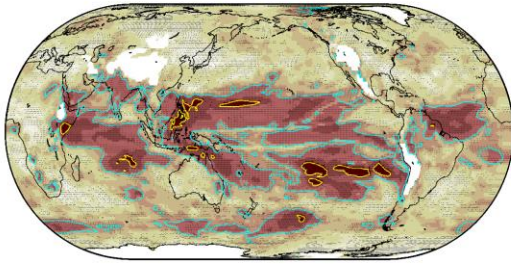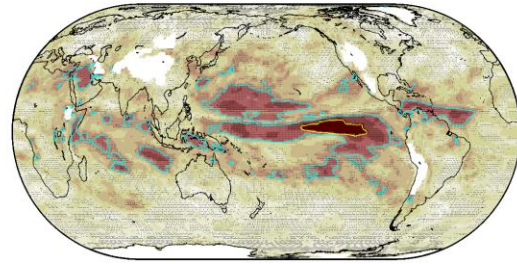

MODELS MEAN: ENSO - FALL OZONE (850 hPa) PERIOD 1850-2014 EXPERIMENT HISTORICAL

MODELS MEAN: ENSO - WINTER OZONE (850 hPa) PERIOD 1850-2014 EXPERIMENT HISTORICAL

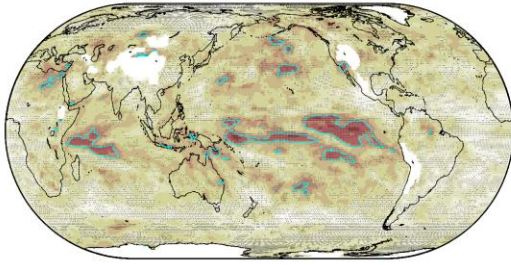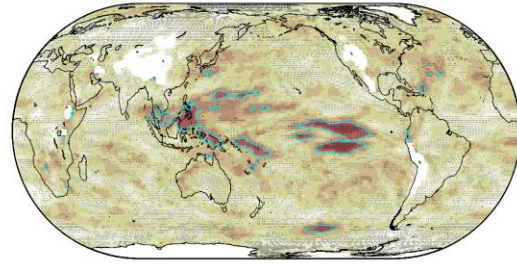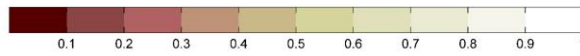

30

31 **Figure S7.** As in Figure S5, but for multi-model mean probability map for the absence of Granger  
32 causality from ENSO to seasonal mean ozone concentrations at 850 hPa pressure level. ENSO: El Niño–  
33 Southern Oscillation.
